# Supplementary material for: Competitive Binding of Natural Amphiphiles with Graphene Derivatives
Source: Springer Nature journal article supplement (doi:10.1038/srep02273), 2013-07-24
Supplement: 41598_2013_BFsrep02273_MOESM1_ESM.pdf [file 41598_2013_BFsrep02273_MOESM1_ESM.pdf]

## SUPPORTING INFORMATION

### **Competitive Binding of Natural Amphiphiles with Graphene Derivatives**

*Slaven Radic<sup>1</sup>, Nicholas K. Geitner<sup>1</sup>, Ramakrishna Podila<sup>1</sup>, Aleksandr Käkinen<sup>2,3</sup>, Pengyu Chen<sup>1,4</sup>, Pu Chun Ke<sup>1,\*</sup> and Feng Ding<sup>1,\*</sup>*

<sup>1</sup>Department of Physics and Astronomy, COMSET, Clemson University, Clemson, South Carolina 29634, United States

<sup>2</sup>Laboratory of Environmental Toxicology, National Institute of Chemical Physics and Biophysics, Akadeemia tee 23, Tallinn 12618, Estonia

<sup>3</sup>Department of Chemical and Materials Technology, Tallinn University of Technology, Ehitajate tee 5, Tallinn 19086, Estonia

<sup>4</sup>Microsystems Technology and Science Laboratory, University of Michigan, Ann Arbor, Michigan 48109, United States

\*E-mail: fding@clemson.edu (F.D.); pckel1@clemson.edu (P.C.K.).

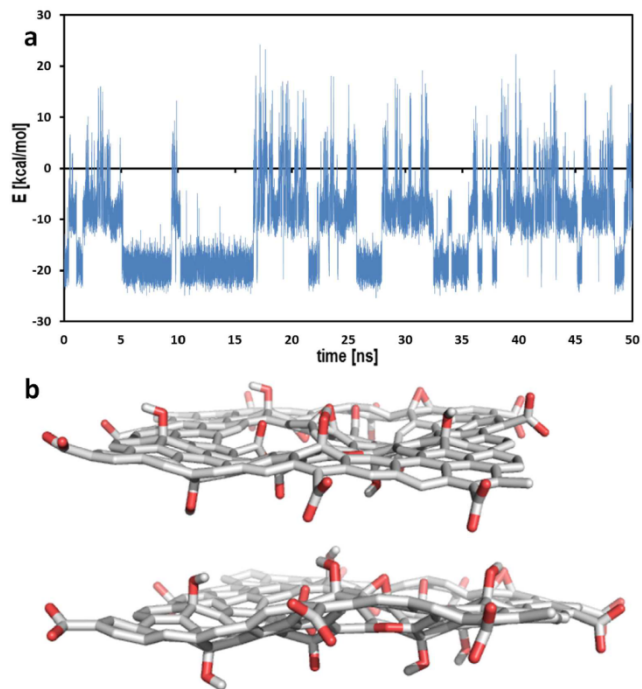

**Figure S1. The high-energy normal mode of the graphene oxide nanosheet.** The simulations were done with the nanosheet alone. (a) At  $T \sim 0.67 \text{ kcal/mol} \cdot k_B$ , the fluctuation of the potential energy indicated excitation of a higher-energy normal mode. (b) The snapshots of the nanosheet in the high-energy state illustrated the twisted normal mode.

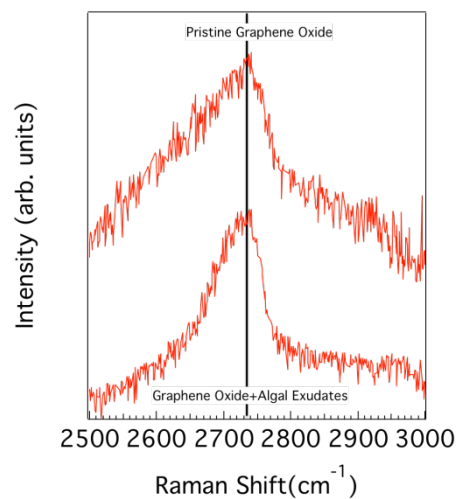

**Figure S2.** Raman spectra of graphene oxide before and after incubation with algal exudates. The absence of any shift in the 2D-band ( $\sim 2730\text{ cm}^{-1}$ ) suggests that the interaction between graphene oxide and exudates was weaker compared to graphene and exudates.

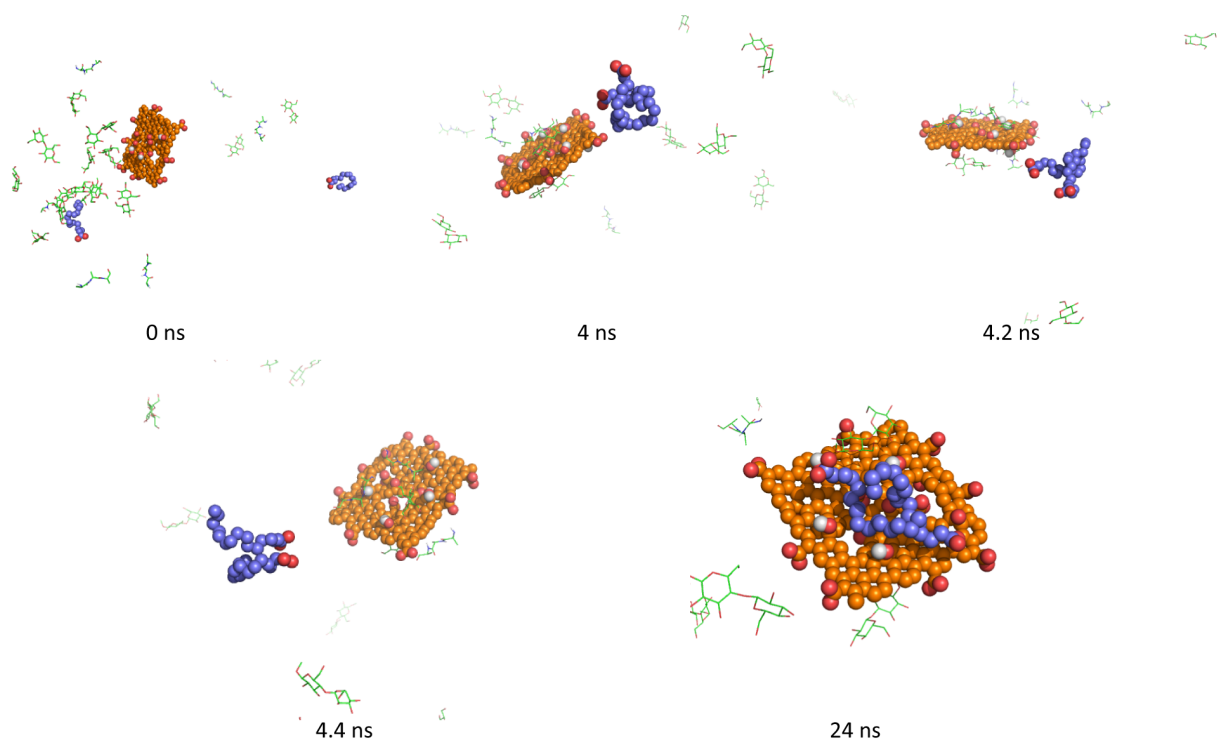

**Figure S3.** Palmitic acids (purple) were observed to bind to each other before their adsorption onto the nanosheet in one of the simulations.
